# Supplementary material
Source: PubMed Central journal article supplement (PMC4172299)
Supplement: la501123b_si_004.pdf [file la501123b_si_004.pdf]

## ASSOCIATED CONTENT

### SUPPLEMENTAL FIGURES

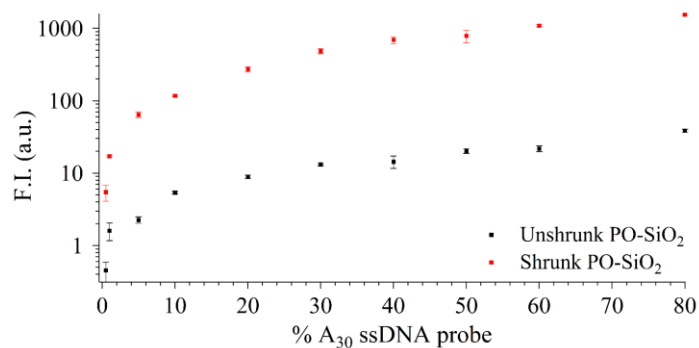

**Figure S1.** Average DNA microarray fluorescence microarray intensities performed on shrunk and non-shrunk PO-SiO<sub>2</sub> substrate. The fluorescence intensity of the background (0%) was subtracted from each of the fluorescence intensities on the shrunk and unshrunk PO-SiO<sub>2</sub>. F.I. corresponds to fluorescence intensity.

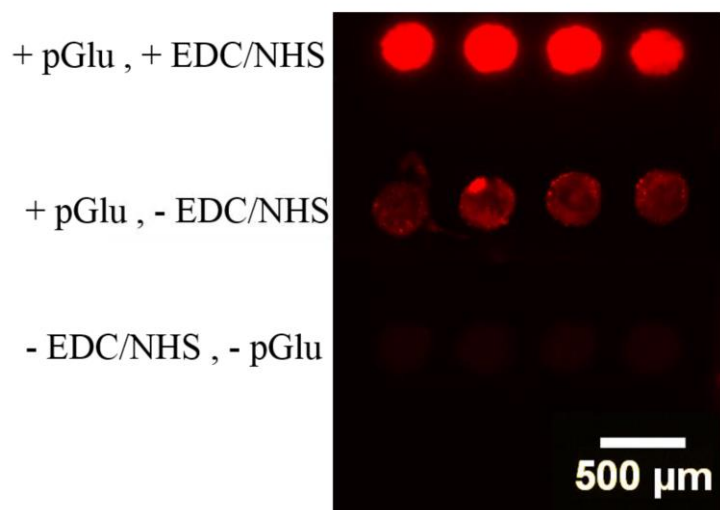

**Figure S2.** Fluorescence images of DNA fluorescence microarray performed in the presence of pGlu and EDC/NHS, in the absence of EDC/NHS, and in the absence of both EDC/NHS and pGlu, respectively, on the shrunk PO-SiO<sub>2</sub> substrate.

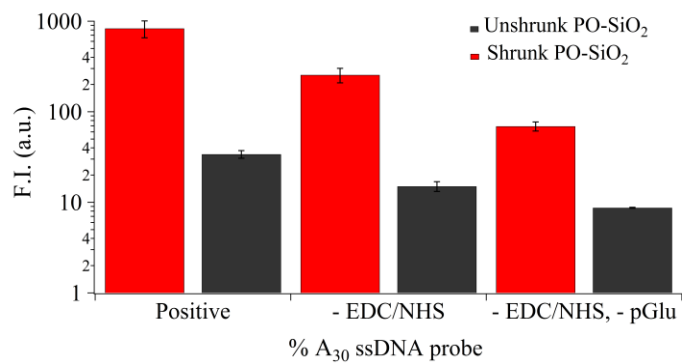

**Figure S3.** Histogram of fluorescence intensities for DNA fluorescence microarray performed in the presence of pGlu and EDC/NHS, in the absence of EDC/NHS, and in the absence of both EDC/NHS and pGlu, respectively. Error bar is calculated by taking the standard deviation of the eight spots. F.I. corresponds to fluorescence intensity.
